# Supplementary material
Source: publisher site journal article supplement (https://www.dovepress.com/article/506783)
Supplement: Supplementary file 1 [file get_supplementary_file.php]

**Table S1 Genes selected using univariate Cox regression**

| Genes | Hazard Ratio | p-value |
| --- | --- | --- |
| PIK3CA | 1.033954538 | 1.53E-08 |
| PTGES3 | 1.008283219 | 1.65E-05 |
| PCMT1 | 1.024544776 | 2.48E-05 |
| XRCC4 | 1.304519187 | 0.000105174 |
| HSP90AA1 | 1.001018755 | 0.000223993 |
| TNIP1 | 0.960385546 | 0.000387945 |
| TCP1 | 1.011359717 | 0.000428576 |
| PARP3 | 0.932272543 | 0.000474213 |
| ETFA | 1.019066663 | 0.000688315 |
| DAXX | 0.970246718 | 0.000739386 |
| YWHAB | 1.009669869 | 0.000845926 |
| IRF1 | 0.929728614 | 0.001153205 |
| MDC1 | 1.037435534 | 0.001245806 |
| TPT1 | 0.996582295 | 0.001655618 |
| WT1 | 1.089005949 | 0.001778632 |
| PAICS | 1.01473418 | 0.001803273 |
| HSPH1 | 1.013759383 | 0.002038163 |
| RPL31 | 0.995164201 | 0.002378961 |
| RPS18 | 0.999393032 | 0.002509513 |
| NR1H3 | 0.91853484 | 0.002911702 |
| GAPVD1 | 1.074932542 | 0.002978406 |
| RAD23B | 1.011930295 | 0.003204393 |
| GRHL2 | 1.02963336 | 0.003541838 |
| UBE2A | 1.037899855 | 0.00363487 |
| POLR2B | 1.018146432 | 0.003692337 |
| RPLP1 | 0.998789693 | 0.003736053 |
| NCBP1 | 1.044700174 | 0.003802652 |
| LTA4H | 0.938255273 | 0.003961194 |
| XRCC1 | 0.951041365 | 0.004118372 |
| STIP1 | 1.008640039 | 0.004626437 |
| LSG1 | 1.035610116 | 0.005176156 |
| PSMB8 | 0.984548684 | 0.005217796 |
| RPS8 | 0.998708349 | 0.006696119 |
| RPL10 | 0.997569116 | 0.006888651 |
| RPS6 | 0.999267494 | 0.007495537 |
| CPPED1 | 1.057408465 | 0.007627269 |
| TAGLN2 | 1.00080129 | 0.007992842 |
| AASDHPPT | 1.063448345 | 0.008021677 |
| RPL34 | 0.996323358 | 0.008873772 |
| NFKB2 | 0.967647852 | 0.00907376 |
| SNW1 | 0.964260285 | 0.009383109 |
| RBM15B | 0.940912077 | 0.009710612 |
| UBTF | 0.96603453 | 0.010260629 |
| MRE11 | 1.066813408 | 0.010303464 |
| CBX5 | 1.030362276 | 0.010700157 |
| CALML5 | 1.000554015 | 0.010726494 |
| CCNT1 | 1.071092828 | 0.011114555 |
| JAK2 | 0.892279679 | 0.011194314 |
| TLN2 | 0.828426766 | 0.011325543 |
| RPS4X | 0.999199236 | 0.012420147 |
| RPL12 | 0.998585094 | 0.012823301 |
| EIF3J | 1.02241363 | 0.012846988 |
| GSTZ1 | 0.888778219 | 0.012926814 |
| ITGAX | 0.910350636 | 0.013355997 |
| RELB | 0.963110468 | 0.014219665 |
| RPS14 | 0.996249644 | 0.014268293 |
| ORC3 | 1.039692893 | 0.014527785 |
| PPP6C | 1.009411789 | 0.015263886 |
| AIFM1 | 1.101018593 | 0.01527309 |
| RACGAP1 | 1.020021639 | 0.015497419 |
| PAFAH1B1 | 1.05527676 | 0.015607688 |
| RGS3 | 1.112368506 | 0.015619888 |
| PRDX1 | 1.002223701 | 0.018260942 |
| COQ8B | 0.833059918 | 0.018463593 |
| AIMP2 | 1.056815559 | 0.019195965 |
| RPS15A | 0.965679355 | 0.019404398 |
| RPA3 | 1.048753493 | 0.01952178 |
| YTHDF3 | 1.01989008 | 0.020021316 |
| TRMT5 | 0.859229683 | 0.020777051 |
| NCAPD3 | 1.060347871 | 0.021066661 |
| MOV10 | 0.950178931 | 0.021637596 |
| RPLP2 | 0.99913197 | 0.022000234 |
| MECOM | 1.121130076 | 0.022113047 |
| USF2 | 0.979477373 | 0.022285337 |
| GRPEL1 | 1.043370893 | 0.022677947 |
| PROSER2 | 0.899855101 | 0.023505582 |
| PFKL | 1.017554796 | 0.023692942 |
| CIRBP | 0.991944688 | 0.023834256 |
| MAX | 0.942800292 | 0.024067182 |
| HNRNPC | 0.987417555 | 0.024088796 |
| ERCC1 | 0.94106811 | 0.024567512 |
| CAND1 | 1.012775301 | 0.025682025 |
| BHLHE40 | 0.997481712 | 0.025698032 |
| YWHAZ | 1.001708361 | 0.026283987 |
| RABIF | 1.045588135 | 0.026639041 |
| REM2 | 0.760939455 | 0.026648956 |
| PTPN23 | 0.948326837 | 0.027132832 |
| NONO | 1.013510692 | 0.028244682 |
| UGDH | 0.99303048 | 0.028424419 |
| PSKH1 | 1.052612611 | 0.029084042 |
| RAD1 | 1.080035954 | 0.029120633 |
| TAF2 | 1.026690458 | 0.029408618 |
| RFC3 | 1.022074943 | 0.029475314 |
| PASK | 0.824250856 | 0.031099295 |
| PTMA | 0.997983898 | 0.031219569 |
| MAP3K5 | 1.043243081 | 0.034607705 |
| CLASRP | 0.947464892 | 0.034853852 |
| DOC2B | 0.932813612 | 0.035250129 |
| SFPQ | 0.983478578 | 0.035899879 |
| CDK8 | 1.047098984 | 0.035946886 |
| MECP2 | 1.114074588 | 0.036283984 |
| UBXN2B | 1.024492231 | 0.036463609 |
| SH3BP1 | 0.814535652 | 0.037654032 |
| LRCH3 | 1.176486885 | 0.038304144 |
| PIM2 | 0.983780018 | 0.039311637 |
| AASS | 0.864863935 | 0.039342989 |
| BRMS1L | 1.142836388 | 0.039421214 |
| TDRKH | 1.03962243 | 0.03995081 |
| CYFIP1 | 1.026400914 | 0.04243915 |
| ENO2 | 1.008226879 | 0.043034933 |
| ATP6V1A | 1.014951971 | 0.043621424 |
| HCLS1 | 0.975351782 | 0.044762554 |
| CHMP4C | 1.012805239 | 0.044802549 |
| XRN2 | 1.009511696 | 0.044982318 |
| RPS7 | 0.995957058 | 0.045276818 |
| RAD51 | 1.056701395 | 0.045852676 |
| PRKD2 | 0.958390654 | 0.046091137 |
| HNRNPD | 0.981375561 | 0.046766522 |
| NFATC2 | 0.91917077 | 0.046813325 |
| GMIP | 0.947249694 | 0.046982906 |
| RPL27 | 0.998466047 | 0.047440119 |
| RPL13 | 0.998609406 | 0.047805682 |
| CDKN1A | 1.005613581 | 0.048566441 |
| PHF20L1 | 1.067306711 | 0.048733428 |
| ENAH | 1.013247966 | 0.049123255 |
| MXI1 | 1.029330006 | 0.049169946 |
| FOXJ1 | 0.961479172 | 0.049570334 |

**Table S2 Genes identified through Lasso Cox analysis**

| Genes | Genes | Genes | Genes |
| --- | --- | --- | --- |
| AASDHPPT | HSP90AA1 | PASK | RPA3 |
| AIMP2 | HSPH1 | PCMT1 | RPS7 |
| BHLHE40 | IRF1 | PFKL | SFPQ |
| CALML5 | ITGAX | PIK3CA | SNW1 |
| CDKN1A | LRCH3 | PIM2 | TAGLN2 |
| CPPED1 | LTA4H | PROSER2 | TCP1 |
| CYFIP1 | MDC1 | PSMB8 | TDRKH |
| DAXX | MECOM | PTGES3 | TLN2 |
| DOC2B | MECP2 | PTMA | TRMT5 |
| EIF3J | MRE11 | RBM15B | UGDH |
| ETFA | MXI1 | RELB | WT1 |
| FOXJ1 | NFATC2 | REM2 | XRCC4 |
| GRPEL1 | PAICS | RGS3 | YWHAB |

**Table S3 Drug sensitivity analysis**

| gene | drug | pearson | p-value |
| --- | --- | --- | --- |
| MECP2 | Palbociclib | -0.357648128 | 0.005023876 |
|  | brigatinib | -0.322280054 | 0.012030322 |
|  | Hydrastinine HCl | 0.31692756 | 0.013616153 |
|  | Okadaic acid | 0.320271428 | 0.012605678 |
|  | PLX-4720 | 0.348558729 | 0.006347 |
|  | Vemurafenib | 0.371388925 | 0.003483232 |
| PCMT1 | GSK-2126458 | -0.348048839 | 0.006429524 |
|  | Everolimus | -0.345066777 | 0.006931249 |
|  | Vorinostat | 0.30528887 | 0.01769484 |
|  | PX-316 | 0.312367031 | 0.015106089 |
|  | Chelerythrine | 0.355939432 | 0.005252259 |
| PFKL | Cisplatin | 0.310007695 | 0.015930314 |
|  | Nitazoxanide | 0.328265307 | 0.010448264 |
|  | Indibulin | 0.362202893 | 0.00445725 |
| PTMA | AZD-8055 | -0.422901752 | 0.000761786 |
|  | OSI-027 | -0.367455427 | 0.003874458 |
|  | Silmitasertib | -0.357048234 | 0.005103041 |
|  | HPI-1 | -0.339337821 | 0.007991915 |
|  | Artemether | 0.305568794 | 0.017585701 |
|  | Fenretinide | 0.30599059 | 0.017422333 |
|  | Artesunate | 0.312326276 | 0.01512001 |
|  | Batracylin | 0.313872202 | 0.014599598 |
|  | Obatoclax | 0.323174648 | 0.011781459 |
|  | malacid | 0.324974847 | 0.011294115 |
|  | artesunate | 0.326252938 | 0.010958785 |
|  | ARTENIMOL | 0.33574508 | 0.008727009 |
|  | Hydroxyurea | 0.336445603 | 0.008579229 |
|  | PX-316 | 0.338935183 | 0.008071517 |
|  | By-Product of CUDC-305 | 0.345595961 | 0.006839792 |
|  | Zalcitabine | 0.345846597 | 0.006796846 |
|  | Ifosfamide | 0.359472274 | 0.004789753 |
|  | aclarubicin | 0.364790751 | 0.004161101 |
|  | Methylprednisolone | 0.366078874 | 0.004020277 |
|  | Dexrazoxane | 0.37201878 | 0.003423951 |
|  | melbex | 0.380341925 | 0.002720427 |
|  | 8-Chloro-adenosine | 0.383891143 | 0.002461801 |
|  | Palbociclib | 0.399064922 | 0.001586088 |
|  | ST-3595 | 0.402375023 | 0.001437077 |
|  | CUDC-305 | 0.407282416 | 0.001239225 |
|  | Nelarabine | 0.409616763 | 0.001154005 |
|  | AT-13387 | 0.411453666 | 0.001090694 |
|  | Pyrazoloacridine | 0.421994758 | 0.00078412 |
|  | PYRAZOLOACRIDINE | 0.45037957 | 0.000305234 |
|  | AMONAFIDE | 0.468276938 | 0.000161187 |
|  | Ribavirin | 0.510242789 | 3.12E-05 |
|  | Chelerythrine | 0.551902606 | 4.85E-06 |
| TAGLN2 | BP-1-102 | -0.416327108 | 0.000937599 |
|  | Oxaliplatin | -0.314197894 | 0.014491942 |
|  | AMONAFIDE | -0.306137705 | 0.017365658 |
|  | Olaparib | 0.300848768 | 0.01950483 |
|  | Deforolimius | 0.301749639 | 0.019125372 |
|  | SNS-314 | 0.301850184 | 0.019083414 |
|  | Rapamycin | 0.305733955 | 0.017521576 |
|  | LY-294002 | 0.325806174 | 0.011075009 |
|  | AZD-5363 | 0.330340422 | 0.00994353 |
|  | Itraconazole | 0.345293801 | 0.006891883 |
|  | XAV-939 | 0.350016871 | 0.006116103 |
|  | Everolimus | 0.412084254 | 0.001069692 |
| TRMT5 | Pluripotin | -0.319155133 | 0.012935571 |
|  | PLX-4720 | -0.303216798 | 0.018520839 |
|  | Artemether | 0.30316356 | 0.018542487 |
|  | Nelarabine | 0.315450929 | 0.014084088 |
|  | Fulvestrant | 0.347572084 | 0.006507535 |
|  | Ribavirin | 0.366260925 | 0.004000718 |
|  | Hydroxyurea | 0.381741917 | 0.002615658 |
|  | Chelerythrine | 0.470944351 | 0.00014611 |
| XRCC4 | Everolimus | -0.31968389 | 0.012778394 |
|  | AMONAFIDE | 0.305366471 | 0.017664527 |
|  | PX-316 | 0.320784568 | 0.012456482 |
|  | PYRAZOLOACRIDINE | 0.324986201 | 0.011291098 |
|  | Ribavirin | 0.398868976 | 0.001595329 |

**Supplementary figure legends**


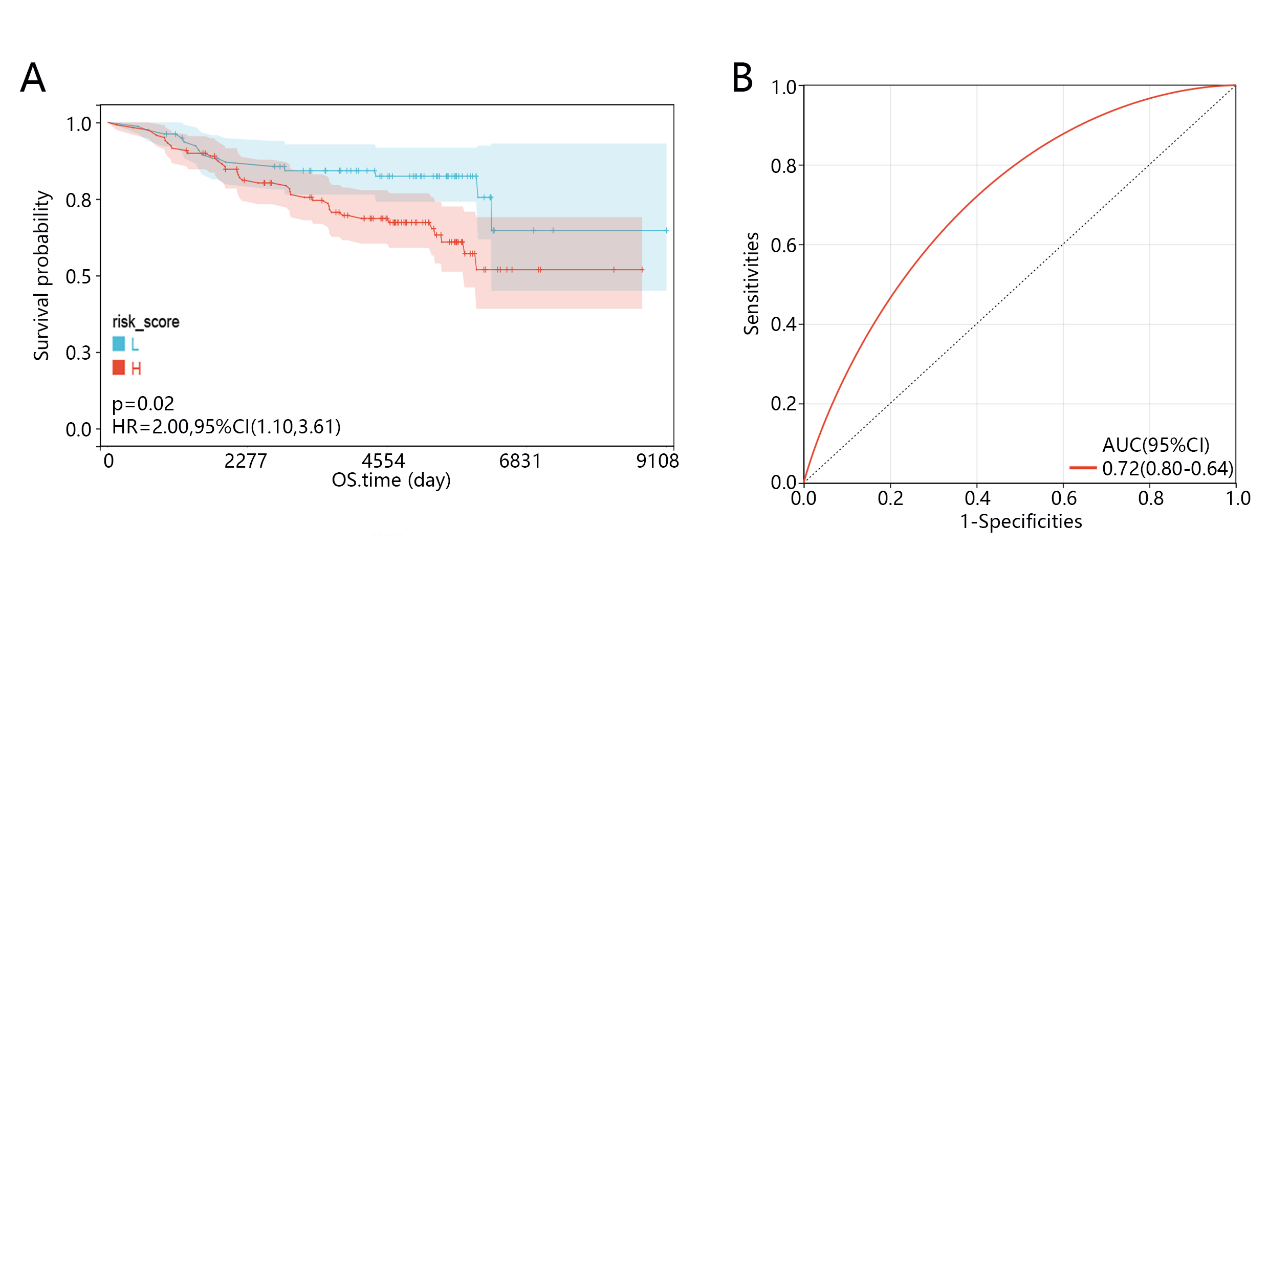
**Figure S1 Validation of the prognostic model’s performance in an external dataset**

(**A**) Kaplan Meier curve for patients in the high-risk and low-risk groups based on the GSE7390 dataset. (**B**) Receiver operator characteristic curve for the prognostic model based on the GSE7390 dataset.


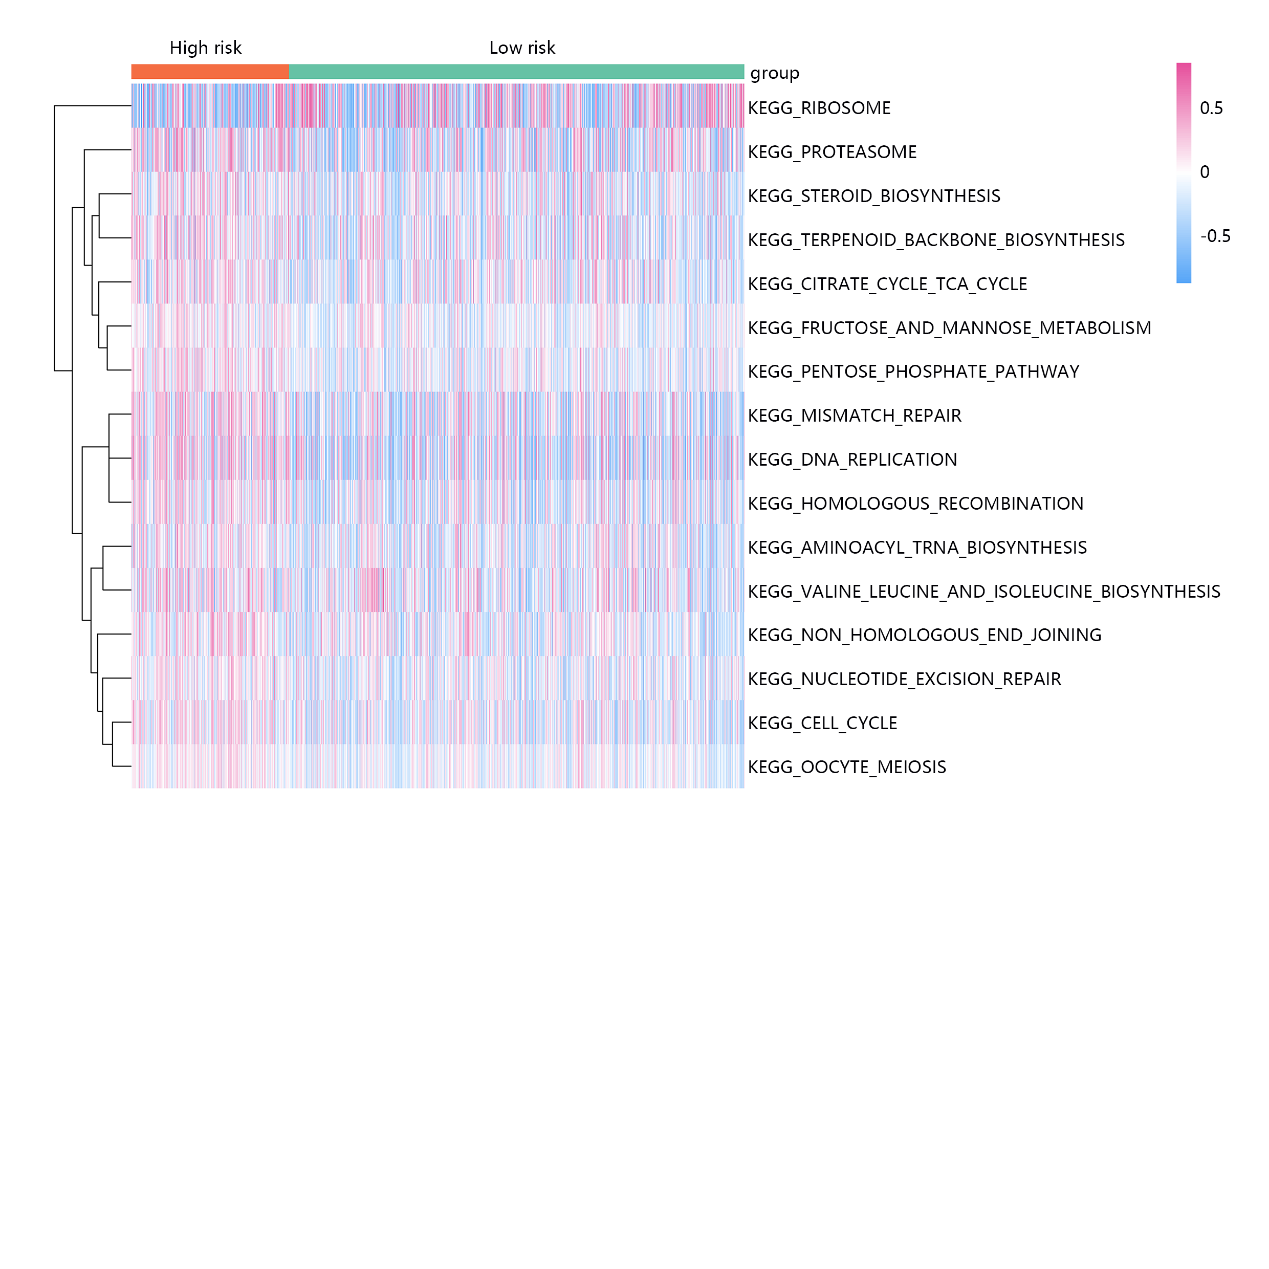


**Figure S2 Heatmap of KEGG pathway enrichment analysis between two different risk groups**
